## **F-type Pyocins are Diverse Non-Contractile Phage Tail-Like Weapons for Killing *Pseudomonas aeruginosa***

Senjuti Saha<sup>a,c</sup>, Chidozie D. Ojobor<sup>a</sup>, Erik Mackinnon<sup>a</sup>, Olesia I. North<sup>b</sup>, Joseph Bondy-Denomy<sup>d</sup>, Joseph S Lam<sup>e</sup>, Alexander W. Ensminger<sup>a,b</sup>, Karen L. Maxwell<sup>b</sup>, and Alan R. Davidson<sup>a,b,#</sup>

<sup>a</sup>Department of Molecular Genetics, University of Toronto, Toronto, Ontario, Canada

<sup>b</sup>Department of Biochemistry, University of Toronto, Toronto, Ontario, Canada

<sup>c</sup>Child Health Research Foundation, Dhaka, Bangladesh

<sup>d</sup>Department of Microbiology & Immunology, Quantitative Biosciences Institute, University of California, San Francisco, San Francisco, California, United States.

<sup>e</sup>Department of Molecular and Cellular Biology, University of Guelph, Guelph, Ontario, Canada

#Address correspondence to Alan R. Davidson, [alan.davidson@utoronto.ca](mailto:alan.davidson@utoronto.ca)

**Running Title:** Characterization of F-type pyocins

**Keywords:** F-type pyocin, bacteriophage, *Pseudomonas aeruginosa*, R-type pyocin, bacteriocin, antibiotic alternative

## 1 **ABSTRACT**

2 Most *Pseudomonas aeruginosa* strains produce bacteriocins derived from contractile or non-  
3 contractile phage tails known as R-type and F-type pyocins, respectively. These bacteriocins  
4 possess strain-specific bactericidal activity against *P. aeruginosa* and likely increase  
5 evolutionary fitness through intraspecies competition. R-type pyocins have been studied  
6 extensively and show promise as alternatives to antibiotics. Although they have similar  
7 therapeutic potential, experimental studies on F-type pyocins are limited. Here, we provide a  
8 bioinformatic and experimental investigation of F-type pyocins. We introduce a systematic  
9 naming scheme for genes found in R- and F-type pyocin operons and identify 15 genes  
10 invariably found in strains producing F-type pyocins. Five proteins encoded at the 3'-end of the  
11 F-type pyocin cluster are divergent in sequence, and likely determine bactericidal specificity. We  
12 use sequence similarities among these proteins to define 11 distinct F-type pyocin groups, five of  
13 which had not been previously described. The five genes encoding the variable proteins associate  
14 in two modules that have clearly re-assorted independently during the evolution of these operons.  
15 These proteins are considerably more diverse than the specificity-determining tail fibers of R-  
16 type pyocins, suggesting that F-type pyocins emerged earlier or have been subject to distinct  
17 evolutionary pressures. Experimental studies on six F-type pyocin groups show that each  
18 displays a distinct spectrum of bactericidal activity. This activity is strongly influenced by the  
19 lipopolysaccharide O-antigen type, but other factors also play a role. F-type pyocins appear to  
20 kill as efficiently as R-type pyocins. These studies set the stage for the development of F-type  
21 pyocins as anti-bacterial therapeutics.

## 22 **IMPORTANCE**

23 *Pseudomonas aeruginosa* is an opportunistic pathogen that causes a broad spectrum of antibiotic  
24 resistant infections with high mortality rates, particularly in immunocompromised individuals  
25 and cystic fibrosis patients. Due to the increasing frequency of multidrug-resistant *P. aeruginosa*  
26 infections, there is great interest in the development of alternative therapeutics. One alternative is  
27 protein-based antimicrobials called bacteriocins, which are produced by one strain of bacteria to  
28 kill other strains. In this study, we investigate F-type pyocins, bacteriocins naturally produced by  
29 *P. aeruginosa* that resemble non-contractile phage tails. We show that they are potent killers of

30 *P. aeruginosa*, and distinct pyocin groups display different killing specificities. We have  
31 identified the probable specificity determinants of F-type pyocins, which opens up the potential  
32 to engineer them to precisely target strains of pathogenic bacteria. The resemblance of F-type  
33 pyocins to well characterized phage tails will greatly facilitate their development into effective  
34 antibacterials.

## 35 INTRODUCTION

36 With increasing antibiotic resistance, there is a strong incentive to identify alternative anti-  
37 bacterial therapeutics. To this end, interest in using phages or parts of phages to treat bacterial  
38 infections has greatly increased in recent years (1), and phage treatments have proven effective  
39 in clearing bacterial infections in humans (2-4). This success notwithstanding, there are potential  
40 drawbacks to phage therapy, including the possibility that introduced phages may acquire and  
41 transmit virulence or antibiotic resistance genes, and that negative outcomes may arise from  
42 long-term phage reproduction within a patient. To circumvent these problems, the therapeutic  
43 potential of phage tail-like bacteriocins, also referred to as tailocins, is also being explored.  
44 Tailocin encoding operons, which are found in many diverse bacterial species, are likely derived  
45 from prophages. The utility of tailocins as antibacterials has been amply demonstrated (5, 6).  
46 Like phages, tailocins are highly specific for their target organism, but they possess additional  
47 advantages. A single tailocin type can be engineered to kill a variety of bacterial species (7, 8),  
48 and tailocins can be efficiently produced in easily cultured organisms, such as *E. coli* (9) or *B.*  
49 *subtilis* (10). In this work, we provide a detailed investigation of a group of tailocins produced by  
50 *Pseudomonas aeruginosa* that are related to non-contractile phage tails.

51 The tailocins of *P. aeruginosa*, discovered many decades ago (11), fall into two types known as  
52 F-type pyocins and R-type pyocins. All *P. aeruginosa* strains possess a gene cluster located  
53 between the *trpE* and *trpG* genes encoding F-type, R-type or both types of pyocins. R-type  
54 pyocins, which are related to contractile-tailed phages, such as *E. coli* phage P2 (12), have been  
55 extensively studied. These entities are produced by different strains of *P. aeruginosa* and have  
56 the ability to kill other strains of the same species. R-type pyocins bind specifically to target  
57 strains, and then puncture their inner membrane, leading to rapid cell death (13). Derivatives of  
58 R-type pyocins with engineered tail fibres are able to kill other species of bacteria, such as *E.*

59 *coli* and *Yersinia pestis*, and these engineered variants have shown efficacy in preventing and/or  
60 ameliorating infection in animal models (6, 9, 14, 15). F-type pyocins, which are related to non-  
61 contractile tailed phages, such as *E. coli* phage lambda (12), have been studied much less than  
62 the R-type. Although encoded in more than half of *P. aeruginosa* strains (16), no experimental  
63 work has been published on F-type pyocins since 1981 (17). The activities of F-type pyocins  
64 produced by five different strains have been described in the literature (17-20), each of which  
65 killed distinct sets of *P. aeruginosa* strains. However, the sequences of the operons encoding  
66 only two of these are known. Based on genome sequencing data, four further groups have been  
67 defined (16), but neither the production nor activity of these groups was assessed. The  
68 mechanism of action and killing specificity determinants of F-type pyocins have not been  
69 defined.

70 Given the potential importance of tailocins in treating bacterial infections and the relative dearth  
71 of information pertaining to F-type pyocins, we undertook a comprehensive investigation of F-  
72 type pyocins encoded in a large number of *P. aeruginosa* strains. The goals of this study were to  
73 bioinformatically characterize F-type pyocin operons and correlate sequence diversity with the  
74 killing spectra of defined F-type pyocin groups. Through this process, we have identified 11  
75 distinct groups of F-type pyocins, and their likely specificity determinants. We conclude that  
76 these F-type pyocins have the potential to be engineered as highly effective anti-bacterial  
77 therapeutics.

## 78 **RESULTS**

### 79 **Selection of *P. aeruginosa* strains for this study**

80 To gain an understanding of the diversity of R-type and F-type pyocins produced by *P.*  
81 *aeruginosa*, we produced lysates of diverse strains selected from our collection (21) by treating  
82 cultures with mitomycin C, which induces pyocin production and cell lysis (22). Each of these  
83 lysates was examined by transmission electron microscopy (TEM), and those displaying  
84 abundant levels of R- and/or F-type pyocins were further analyzed (Fig. 1). Ultimately, a set of  
85 30 strains was chosen that produced only F-type (n = 8), only R-type (n = 9) or both R- and F-  
86 type (n = 13) pyocins. This set contained clinical and environmental strains from seven different  
87 countries, collected over a few decades (Supplementary Table 1). Twenty-eight of the 30 strains

88 were sequenced, assembled and annotated in this study (annotated genomes of strains PAO1 and  
89 PA14 were obtained from the Pseudomonas Genome Database (23)).

## 90 **Conserved features of R/F-type pyocin clusters**

91 The R- and F-type pyocin gene clusters are invariably found between the *trpE* and *trpG* genes in  
92 *P. aeruginosa* (12). To locate these gene clusters in each genome that was sequenced in this  
93 study, the regions between gene *trpE* and *trpG* were extracted and analyzed (Fig 2a). Each of the  
94 30 sequenced genomes was found to encode an F-type- or R-type pyocin, or both, corresponding  
95 with the observed production of pyocin particles observed by electron microscopy. In total, 23 R-  
96 type and 21 F-type pyocin gene clusters were present in our analyses. The gene content of the  
97 pyocin clusters was constant across all the strains. We observed eight genes, designated *pyoRF1*  
98 to *pyoRF8*, which were found in all clusters, 15 genes specific to R-type pyocins (*pyoR1* to  
99 *pyoR15*), and 15 genes specific to F-type pyocins (*pyoF1* to *pyoF15*) (Fig. 2a, Table 1). The  
100 *pyoRF1* and *pyoRF2* genes encode the PrtN activator and PrtR repressor, respectively. These  
101 proteins regulate expression of the cluster in response to DNA damage as previously described  
102 (22). The *pyoRF3* and *pyoRF4* gene products are uncharacterized, but their predicted functions  
103 suggest a role in regulating expression of the gene cluster. Analysis by HHpred indicates that the  
104 *pyoRF3* gene encodes a putative zinc-binding transcription factor and *pyoRF4* encodes a putative  
105 transcription anti-terminator protein similar to gpQ of phage lambda (24). Homologs of PyoRF3  
106 are found in more than 100 phage and prophage genomes, while homologs of PyoRF4 are found  
107 in a much smaller number of phages and prophages. The *pyoRF5* to *pyoRF8* genes encode a  
108 complete set of phage-like lysis genes, including a peptidoglycan hydrolase, holin, and Rz and  
109 Rz1-like spannins (25). In operons encoding only F-type pyocins all eight *pyoRF* genes precede  
110 the genes encoding the F-type pyocin specific genes. In clusters encoding just R-type pyocins, or  
111 those encoding both R- and F-type pyocins, the R-type pyocin specific genes are inserted within  
112 the lysis gene cluster between *pyoRF5* and *pyoRF6* (Fig. 2a).

113 Within the 22 R-type pyocin clusters in the genomes studied here, 13 of the 15 encoded proteins  
114 are highly conserved among the clusters, with at least 97% sequence identity between each gene  
115 product, as has been previously documented (15). The two proteins that vary significantly are  
116 PyoR6 and PyoR7, which encode the tail fiber and tail fiber chaperone, respectively. The tail  
117 fiber determines the specificity of R-type pyocins and the chaperone is specific to its cognate

118 fiber. We compared the fiber and chaperone proteins of each of our sequenced clusters to those  
119 of the characterized R-type pyocin types (15). Fiber sequences of the R2-, R3- and R4-types are  
120 very similar to each other (> 98% identical). Hence, we considered groups R2, R3 and R4 as one  
121 group and called it group R2, as was done in a previous study (26). For the R-type pyocin  
122 clusters sequenced here, ten belonged to the R1 group, ten to the R2 group, and two to the R5  
123 group. As R-type pyocins have been well characterized in previous studies (7, 8, 15), we focused  
124 the present investigation on the F-type pyocins.

## 125 **Conserved proteins encoded in the F-type pyocin cluster**

126 The *pyoF2* to *pyoF10* genes encode confidently annotated functions required for formation of the  
127 F-type pyocin tube and tip (Table 1). The protein products of each of these genes are clearly  
128 homologous to phage tail proteins (27), and these proteins are very similar (~ 95% pairwise  
129 sequence identity) among the 21 F-type pyocin gene clusters that we have analyzed. Although  
130 the F-type pyocin genes are arranged in an order that is syntenic with the genome of the well  
131 characterized *E. coli* phage lambda (12), only the tail tip and central fiber proteins (PyoF6 to  
132 PyoF10) of this phage share significant sequence identity with F-type pyocin proteins (31 to 38%  
133 sequence identity). The phage tail region with the greatest similarity to the F-type pyocin cluster  
134 across the tube and tail tip region is that from *E. coli* phage HK022. (Table 1). The HK022  
135 proteins share 43% sequence identity, on average, to those of the F-type pyocin (Table 1). No  
136 prophage tail region was more closely related to the F-type pyocin cluster than phage HK022  
137 across the whole cluster, though some *P. aeruginosa* prophages were more closely related to the  
138 3'-end of the cluster where genes encoding the tail tip proteins are located.

139 An unusual feature of F-type pyocin regions as compared to phage tails is the lack of any protein  
140 with detectable similarity to a tail terminator. This protein is essential for phage tails because it is  
141 required to join the tail to the head (28). The tail terminator also prevents uncontrolled  
142 polymerization of the tails of some (28), but not all phages (29). Since F-type pyocins are not  
143 joined to a head, the tail terminator appears to be dispensable. The *pyoF1* gene lies in the  
144 genomic position expected for a tail terminator gene. However, the 95 amino acid protein  
145 encoded by this gene bears no detectable sequence similarity to tail terminators, has no homologs  
146 outside of *P. aeruginosa* F-type pyocin clusters, and stop codons are observed in this ORF in

147 several strains. Thus, we conclude that this is not a functioning protein as was also concluded in  
148 a previous publication (12).

## 149 **F-type pyocins can be grouped based on proteins encoded at the 3'-** 150 **end of the cluster**

151 The host range specificity of phages is determined by proteins located at the tail tip, which are  
152 typically encoded by genes at the 3'-end of tail-encoding regions (27). The analogous proteins in  
153 the F-type pyocin are encoded by genes *pyoF10-pyoF15*. Non-contractile tails resembling F-type  
154 pyocins possess a long (> 700 residues) central fibre protein that projects directly below the tail  
155 tip. In phage lambda, the region within the last 250 residues of the central fiber mediates host  
156 cell specificity and surface binding (30, 31). The homologous protein in F-type pyocins is  
157 encoded by *pyoF10*. We observed that the first 1160 residues of the PyoF10 proteins are highly  
158 conserved among F-type pyocins (> 93% sequence identity), but the last 60 residues vary greatly,  
159 with pairwise identities in this region often ranging below 35% (Fig. S1). This sequence  
160 variability is consistent with a role for the C-terminus of PyoF10 in mediating host specificity.

161 In addition to the last 60 residues of PyoF10, the other five proteins encoded at the 3'-end of the  
162 F-type pyocin cluster, PyoF11 to PyoF15, were found to vary considerably in sequence between  
163 different F-type pyocin clusters. Based on pairwise comparison of homologous proteins encoded  
164 in this region of the clusters (Fig. S1), the F-type pyocin regions found in different genomes were  
165 divided into six groups, F1, F2, F4, F5, F6 and F7 (Fig. 2b). Regions were placed into the same  
166 group if each of their corresponding homologous proteins shared at least 90% sequence identity  
167 with all others in the group. The nomenclature used here extends from previous work where  
168 groups F1 to F3 were established based on differences in host killing specificity (17). We do not  
169 know if any of the groups identified here match group F3 because no examples from this group  
170 have been sequenced. The groups that we called F4 and F6 have not been previously recognized,  
171 while group F5 and F7 were previously described in *P. aeruginosa* strains PA14 and DK2,  
172 respectively (16). The two most frequently occurring groups are F2 (11 members) and F7 (4  
173 members). The F1, F5 and F6 groups were encoded only in pyocin clusters that also encoded R-  
174 type pyocins, while F4, F7, and F2 group clusters were found in the absence of R-type clusters  
175 except in two instances (both F2 group). Further bioinformatic comparisons described below

176 compare representative protein sequences from each of the six F-type pyocin groups that we  
177 identified here.

## 178 **PyoF11 and PyoF12 are newly recognized conserved proteins**

179 PyoF11 and PyoF12 are proteins of unknown function that are encoded in every F-type pyocin  
180 region. These are the most diverse proteins in the F-type pyocin clusters, often displaying  
181 pairwise sequence identities of less than 25% (Fig. S1). Despite their diversity, the homologs of  
182 these proteins from the six groups could be convincingly aligned (Fig. S2a,b). We used HMMer  
183 (32) to create Hidden Markov Model (HMM) profiles from the PyoF11 and PyoF12 alignments.  
184 Searching with these HMMs, we identified more than 50 occurrences each of *pyoF11* and  
185 *pyoF12* gene homologs in diverse phages and prophages. These genes often occur together and  
186 invariably lie immediately 3' to the central fiber gene (homolog of *pyoF10*). In some phage  
187 genomes, the *pyoF11* and *pyoF12* genes are very likely the last genes in the tail operon as they  
188 are followed immediately by lysis genes (e.g. *Burkholderia* phage Bcep176 and *Xanthomonas*  
189 phage CP1). These observations suggest that PyoF11 and PyoF12 function in conjunction with  
190 the central fiber protein, possibly binding to it or acting as chaperones to aid in folding of the  
191 fiber. PyoF11 and PyoF12 had not been previously recognized as conserved proteins in the F-  
192 type pyocin cluster because these ORFs are not annotated as proteins in most *P. aeruginosa*  
193 genomes. This is likely a result of the lack of annotation of these genes in the PA14 genome,  
194 which is commonly used as the reference genome for genome assembly and annotation. The  
195 functions of PyoF11 and PyoF12 homologs in phages have never been investigated.

## 196 **PyoF13, PyoF14, and PyoF15 are likely involved in host specificity**

197 In addition to the central fiber, most non-contractile tailed phages possess genes downstream of  
198 the central fiber gene that also encode cell surface receptor binding proteins. These are known as  
199 “side fibers” in *E. coli* phage lambda (33). The PyoF13 proteins, which share a common genomic  
200 position with the lambda side fibers, are likely involved in determining host range specificity,  
201 functioning as receptor binding proteins. A striking feature of the PyoF13 homologs is that their  
202 N-termini (the first 140 residues) are very similar among the F-type pyocin groups with pairwise  
203 sequence identities ranging from 55% to 90% while the pairwise identities in their C-terminal  
204 regions generally range between 20% and 35% (Fig. S1, S3). We surmise that the more



205 conserved N-terminus of PyoF13 mediates binding of this putative receptor binding protein to  
206 the F-pyocin tail tip, while the variable C-terminus mediates cell surface binding. The fibers  
207 from different groups of R-type pyocins, which have been shown to determine bactericidal  
208 specificity (15), display the same type of conservation pattern with N-terminal regions (first 450  
209 residues) displaying greater than 95% pairwise sequence identity and C-terminal regions (last  
210 250 residues) displaying pairwise sequence identities between 50 and 70% (Fig. S4). In contrast  
211 to the F-type pyocins, there are only three distinct groups of R-type pyocins, as defined by fiber  
212 sequences, and there is much less variability.

213 Homologs of PyoF13, which share sequence similarity with its N-terminal region, are found in  
214 diverse phages and prophages and are located in similar genomic positions as *pyoF13*,  
215 downstream from the central fiber gene. Genes encoding homologs of PyoF14 (~100 residues)  
216 and PyoF15 (~75 residues) are also found in many phages and prophages, and they are invariably  
217 located downstream of *pyoF13* homologs or genes encoding other putative phage receptor-  
218 binding proteins. The sequences of PyoF14 and PyoF15 are variable, mirroring the sequence  
219 variation seen in the C-terminal regions of PyoF13 (Fig. S1). We expect that PyoF14 and  
220 PyoF15 are involved in host range specificity through interactions with PyoF13, or possibly by  
221 acting as chaperones for the assembly of PyoF13 as is required for phage-encoded receptor  
222 binding proteins (34).

223 Two F-type pyocin groups deviate from the others in the *pyoF13* to *pyoF15* region. The F2  
224 group has a complete duplication of this region so that it possesses two copies of each gene. The  
225 proteins encoded by the first copy, PyoF13<sub>1</sub> to PyoF15<sub>1</sub>, are distinct in sequence compared to the  
226 homologs in other groups (Fig. S1, Fig S3). Conversely, PyoF13<sub>2</sub> to PyoF15<sub>2</sub> are very similar (>  
227 90% identical) to homologs found in groups F4 and F5. In contrast to all other groups, group F7  
228 lacks a *pyoF14* gene. Consistent with this absence, its PyoF13 homolog displays a C-terminal  
229 region that has no detectable sequence similarity to the other groups.

## 230 **Characterization of F-type pyocin bactericidal specificity**

231 To determine if our bioinformatic groupings of the F-type pyocin clusters correlate with  
232 bactericidal specificity, we examined the killing profiles of lysates produced from the 30 strains  
233 following induction by mitomycin C. Serial dilutions of lysates of each of the 30 strains were  
234 spotted onto lawns of the same 30 strains to produce an all-against-all matrix. Bactericidal

235 activities were detected as zones of clearing on the bacterial lawn. Analysis of these data was  
236 complicated because *P. aeruginosa* produces other bactericidal entities in addition to R-type and  
237 F-type pyocins, including S-type pyocins (11) and bacteriophages. Since the presence of any of  
238 these can produce zones of clearing, further analyses were necessary to delineate the type of  
239 activity present. Testing serial dilutions of lysates allowed us to distinguish clearings produced  
240 by phages from those produced by pyocins (Fig. 3a). Due to their replicative nature, clearings  
241 resulting from phage lysates resolved into individual plaques upon dilution, while the clearings  
242 resulting from pyocins gradually disappeared without the appearance of individual plaques (Fig.  
243 3a). Lysates were also spotted onto bacterial lawns containing proteinase K, which eliminated  
244 clearings caused by protease sensitive S-type pyocins (Fig. 3a) (11). By analyzing the activities  
245 of the 30 lysates on 30 strains in this manner, we detected more than 450 bactericidal  
246 combinations and found that greater than 90% were due to R- or F-type pyocins (Fig. S5).

247 All groups of R-type and F-type pyocins identified displayed bactericidal activities against  
248 multiple strains. Notably, the killing spectra of lysates were invariably the same if they contained  
249 pyocins of the same R- or F-type group (Fig. S5). For example, lysates of four different strains  
250 encoding F7 pyocins all displayed bactericidal activity against the same 11 strains (note that in a  
251 single case the F-type pyocin activity was occluded by the presence of phage activity as denoted  
252 by an orange color, Fig S5). These results demonstrate that our classification of pyocins based on  
253 sequence analysis is predictive of biological activity. In Fig. 3b, a small subset of the bactericidal  
254 data are shown to emphasize the differences in the killing spectra of the F-type pyocin groups.  
255 No two groups kill exactly the same set of bacterial strains; however, considerable overlap exists  
256 between some groups like F4 and F5. We also noted that no strain was susceptible to an R- or F-  
257 type pyocin that was encoded in its own genome, which is consistent with previous observations  
258 that strains are resistant to their own pyocins (35). Since the F1 and F6 groups were encoded  
259 only in strains that also encoded R1 pyocins, the killing caused only by the F-type pyocins could  
260 not be discerned. However, comparison with results obtained using a strain encoding only an R1  
261 pyocin revealed that strain S25 is susceptible to F1 pyocin as it was killed by a lysate containing  
262 F1 and R1 pyocins, but not by a lysate containing only R1 pyocin (Fig. 3b). By the same logic,  
263 strain S30 was found to be killed by F6 pyocin. The F5 group was found only in strains that also  
264 encode an R-type pyocin. To assess the activity of this group we took advantage of a transposon

265 insertion mutant of an essential R-type pyocin gene in PA14 (36) to detect the activity of the F5  
266 pyocin alone (Fig. 3b).

## 267 **F-type and R-type pyocins display similar levels of bactericidal** 268 **activity**

269 It was previously reported that one R-type pyocin particle is sufficient to kill a single cell, while  
270 up to 280 F-type pyocin particles are required to kill the same cell (19). This implies that an F-  
271 type pyocin containing lysate would have considerably less killing activity than an R-pyocin  
272 containing lysate. However, we observed many cases where lysates of F-type pyocins displayed  
273 levels of killing activity as high R-type pyocin lysates. Although R- and F-type pyocin lysates  
274 may contain different numbers of particles, we do not expect these numbers to deviate greatly as  
275 all pyocin operons utilize the same transcriptional regulatory region. Most convincingly, we  
276 tested the bactericidal activity of lysates of two PA14 mutants, one of which carried a transposon  
277 insertion in an essential R-type pyocin gene (*pyoR6*) and one of which carried a similar insertion  
278 in an essential F-type pyocin gene (*pyoF10*). It can be seen that the bactericidal activity of these  
279 two lysates was the same, indicating that F-type pyocins and R-type pyocins are equally lethal to  
280 a susceptible host (Fig. 3c). We observed that the same F-type pyocin lysate may display  
281 different levels of activity on different strains. For example, lysates of F7 group pyocins  
282 displayed greater than 10-fold greater bactericidal activity on strain PAO1 as on strain S14 (Fig.  
283 3d). The previously observed low activity of F-type pyocins was likely caused by use of a non-  
284 optimal indicator strain. Overall, our data indicate that F-type pyocins have the potential to kill  
285 bacterial cells as efficiently as R-type pyocins.

## 286 **The genes downstream of *pyoF10* are required for bactericidal activity**

287 Although homologs of the proteins encoded at the 3'-end of the F-type pyocin cluster (PyoF11 to  
288 PyoF15) are encoded in phages and prophages, the roles of these proteins have never been  
289 investigated. To determine whether these proteins are essential for bactericidal activity, we tested  
290 the activity of F-type pyocin mutants in strain PA14 (group F5). We tested transposon insertion  
291 mutations in *pyoF14*, and *pyoF15* from the PA14 non-redundant transposon mutant library (36).  
292 We constructed in-frame deletion mutations in *pyoF11* and *pyoF12* and a nonsense mutation in  
293 *pyoF13* (Supplementary Materials and Methods). Mutations in each of these genes completely

294 abrogated bactericidal activity, indicating that their protein products play essential roles in the  
295 production of functional F-type pyocin particles (Table 2). To ensure that the loss of activity  
296 resulting from these mutations was the result of abrogation of only the gene in which the  
297 mutation was located, each gene was cloned into a plasmid expression vector (Supplementary  
298 Materials and Methods) and we determined whether mutations could be complemented by the  
299 plasmid expressed genes. The *pyoF12* mutant could be complemented by a plasmid expressing  
300 only *pyoF12* (Table 2). However, complementation of the *pyoF11* mutant required plasmid-  
301 based expression of both *pyoF11* and *pyoF12*. A plasmid expressing only *pyoF12* did not  
302 complement the *pyoF11* mutant. We conclude that both *pyoF11* and *pyoF12* are essential for  
303 bactericidal activity, and that the *pyoF11* in-frame deletion mutation also causes loss of *pyoF12*  
304 activity, possibly through a polarity effect. Through a similar series of plasmid based  
305 complementation experiments, we determined that *pyoF13*, *pyoF14*, and *pyoF15* are also  
306 essential for bactericidal activity, and that polarity effects are also manifested in this group of  
307 genes (Table 2). For example, while the *pyoF15* mutation could be complemented by expression  
308 of *pyoF15* alone, complementation of the *pyoF14* mutation required expression of both *pyoF14*  
309 and *pyoF15*.

### 310 **Serotype correlates with F-type pyocin killing spectra**

311 The outer membrane lipopolysaccharide (LPS) of *P. aeruginosa* is composed of three domains:  
312 lipid A, core oligosaccharide and a long-chain polysaccharide O-antigen (37). Most *P.*  
313 *aeruginosa* strains produce two distinct forms of O-antigen; a homopolymer of D-rhamnose  
314 known as the common polysaccharide antigen, and a heteropolymer repeat of three to five  
315 distinct sugars known as the O-specific antigen (OSA), which forms the basis of *P. aeruginosa*  
316 serotyping. Previous studies showed that the OSA acts a receptor for some R-type pyocins, while  
317 it blocks killing by other R-type pyocins (26). To investigate the effect of the OSA on the  
318 activity of F-type pyocins, we experimentally determined the serotypes of the 30 strains used in  
319 this study by a slide agglutination assay. We observed a correlation between the serotype of a  
320 strain and its F-type pyocin susceptibility profile (Fig. 4a). For example, all three strains of O2  
321 serotype were resistant to all F-type pyocins, while the four O5 strains were killed only by F7  
322 pyocins. Among the eight O6 serotype strains, the F2 pyocin killed all, but the F4, F5, and F7  
323 pyocins were unable to kill some of these strains (Fig. 4a). The resistance of O6 strains S12 and

324 S27 to the activity of the F4 pyocin is expected as these strains encode an F4 pyocin. However, it  
325 is not clear why the F7 pyocin fails to kill O6 strains S12, S27, and S5, or why strain S12, alone  
326 among O6 strains, is resistant to F5 pyocin. Similarly, the F1 pyocin kills strain S25 but no other  
327 O6 strains, and the F6 pyocin kills strain S6 but no other O13/O14 strains. These data show that  
328 factors independent of OSA and pyocin type encoded within a strain contribute to F-type pyocin  
329 susceptibility.

330 To directly assess the role of OSA in F-type pyocin activity, we tested  $\Delta wbpM$  mutant strains,  
331 which lack OSA in strains PAO1 and PA14 (Fig 4b). The F7-type pyocin is active against PAO1,  
332 but was unable to kill the PAO1 $\Delta wbpM$  mutant, suggesting that this pyocin uses the OSA as a  
333 receptor. By contrast, the  $\Delta wbpM$  mutants of PAO1 and PA14 became susceptible to the F4  
334 group, though the wild-type strains were not. In this case, the OSA appears to block the pyocin  
335 from contacting its receptor. The F2 and F5 groups, which are unable to kill PAO1 or PA14,  
336 were also not able to kill the mutants lacking OSA. Strains producing the F1 and F6 group  
337 pyocins were unable to kill PAO1 with or without OSA, but PA14 $\Delta wbpM$  did become  
338 susceptible to killing. However, this effect may have been due to the R1 pyocins produced by  
339 these strains. From these experiments with strains lacking OSA, it is clear that the presence of  
340 OSA affects the bactericidal activity of the F4 and F7 groups while the data are inconclusive for  
341 the other groups.

## 342 **Discovery of new groups of F-type pyocins**

343 To determine if this collection of F-type pyocin described above encompassed the full diversity  
344 of F-type pyocins found across the *P. aeruginosa* species, we performed BLAST searches  
345 against all *P. aeruginosa* genomes in the NCBI database using a PyoF13 sequence as the query  
346 with the goal of identifying homologs with distinct sequences (i.e. share less than 90% sequence  
347 identity with those in our established F-type pyocin groups). PyoF13 was chosen for these  
348 searches because it is highly conserved among the F-type pyocin operons in its N-terminal  
349 region, yet its C-terminal region varies depending on the pyocin group. We discovered three  
350 PyoF13 homolog families encoded in F-type pyocin operons that shared less than 70% sequence  
351 identity to any other PyoF13 group. F-type pyocins encoding these newly identified PyoF13  
352 varieties were defined as groups F8, F9, and F10. The F9 group is identical to a previously  
353 identified group designated as the PA7 group (16). Another identified group, called F11,

354 possessed PyoF13, PyoF14, and PyoF15 homologs that are greater than 95% identical to group  
355 F2<sub>2</sub>, F4 and F5, but the PyoF10, PyoF11, and PyoF12 were unique. Finally, group F12 combined  
356 PyoF10 to PyoF12 homologs that were 99% identical to group F11 with PyoF13 to PyoF15  
357 homologs that were greater than 95% identical to group F10 (Fig. 5, S1). Group F12 was  
358 previously identified in *P. aeruginosa* strain M18 (16). The sequences of proteins PyoF10 to  
359 PyoF15 for all eleven F-type pyocin groups can be found in Appendix 1 (Supplementary  
360 Material).

361 Pairwise sequence comparisons among all the F-type pyocin groups that we have identified  
362 strongly supports the existence of two distinct specificity modules in F-type pyocins (Fig. S1).  
363 Whenever the C-terminal regions of PyoF10 proteins in two groups are highly similar (> 90%  
364 identity), then the PyoF11 and PyoF12 proteins are also highly similar. Similarly, when two  
365 groups have PyoF13 proteins with highly similar C-terminal regions, then the PyoF14 and  
366 PyoF15 proteins are also highly similar. Therefore, we have designated regions encoding the C-  
367 terminus of PyoF10, PyoF11, and PyoF12 as Specificity Module 1 and regions encoding  
368 PyoF13, PyoF14, and PyoF15 as Specificity Module 2. Among our full set of pyocin groups, we  
369 observed three instances where the same Specificity Module 1 region assorted with different  
370 Specificity Module 2 regions (Fig. 5). We also observed three cases where identical Specificity  
371 Module 2 regions assorted with different Specificity Module 1 regions. These data indicate that  
372 recombination events have occurred between different F-type pyocin operons.

## 373 **DISCUSSION**

374 This study provides a comprehensive analysis of F-type pyocin operons present in *P. aeruginosa*  
375 strains. We have defined the conserved genes in these operons and introduced a systematic  
376 naming system for them. The initial 21 F-type clusters examined in strains from our collection  
377 were categorized into six different groups, two of which were previously known (F1 and F2) and  
378 four of which were named in this study (groups F4 to F7). The killing specificity of each of these  
379 groups was shown to be distinct. An additional five F-type pyocin groups were discovered  
380 bioinformatically, but the killing specificity of these groups remains to be tested. Importantly, we  
381 identified two highly diverse F-type pyocin genes, *pyoF11* and *pyoF12*, which are not annotated  
382 as genes in many *P. aeruginosa* strains, yet are essential for bactericidal activity. The sequence

383 diversity in these two genes contributes to defining the F-type pyocin groups. An important  
384 finding is that there are no genes in the F-type pyocin operons that are not also found in the  
385 genomes of phages or prophages. Thus, the ability of these pyocins to efficiently kill bacteria  
386 while isolated phage tails do not must be due to sequence modifications within their phage-  
387 derived proteins, not to the presence of unique toxin-encoding genes (unless such genes are  
388 encoded elsewhere in the *P. aeruginosa* genome). Fully active R-type pyocins have been  
389 produced heterologously in *E. coli* from a plasmid vector including only genes from the R-type  
390 pyocin operon, indicating that their toxicity does not rely on genes outside of this region (9).

391 Analysis of the F-type pyocin operons clearly indicates the genes that are involved in killing  
392 specificity. The proteins encoded by the *pyoF2* to *pyoF9* genes are highly similar in all the F-  
393 type pyocin groups. Divergence among the groups begins with the last 60 residues of PyoF10  
394 and extends through PyoF15. We defined the F-type pyocin groups according to sequence  
395 identity among these proteins (Fig. 5). Since F-type pyocins within the same group invariably  
396 displayed the same killing spectra (Fig. S5), we conclude that some or all of the *pyoF10* to  
397 *pyoF15* region determines killing specificity. By examining the patterns of recombination among  
398 the specificity genes, we defined two specificity modules: Module 1 (*pyoF10* to *pyoF12*) and  
399 Module 2 (*pyoF13* to *pyoF15*). The occurrence of highly similar Module 1 regions with distinct  
400 Module 2 regions and vice versa in different F-type pyocin groups indicates that the two modules  
401 act independently of one another (Fig. 5). This conclusion is supported by the appearance of  
402 *pyoF11* and *pyoF12* homologs without adjacent *pyoF13*-*pyoF15* homologs and vice versa in  
403 phages and prophages. Since these families of proteins have not been characterized, defining  
404 their roles in host specificity will be an important goal for further study.

405 The strong sequence similarity between most of the F-type pyocin genes implies that all the  
406 groups are descended from a common ancestor that likely arose from a defective prophage.  
407 However, it is also clear that some type of horizontal gene transfer mechanism has been  
408 responsible for the evolution of the specificity regions, which are comprised of different  
409 combinations of Specificity Modules 1 and 2. These reassortments could be caused by phages  
410 carrying genes that are similar to these F-type pyocin genes occasionally recombining with the  
411 homologous F-type pyocin genes. With respect to the evolution of the F- and R-type pyocins as a  
412 whole, it is relevant that the F-type display considerably more divergence among their  
413 specificity-determining genes as compared to the R-type (Fig. S1, S4). This suggests that the F-

414 type pyocins may have arisen first and, thus, have had more time to diverge. Also supporting the  
415 possibility that the F-type pyocin operon appeared first is that the R-type pyocin genes are  
416 inserted in the middle of the lysis genes, which comprise an intact lysis cassette in strains  
417 possessing only an F-type operon.

418 The bacterial cell surface receptors of F-type pyocins were previously unknown. Our  
419 examination of the activity of the different F-type pyocin groups on 12 different serotypes of *P.*  
420 *aeruginosa* revealed a clear correlation between bactericidal activity and O-antigen serotypes  
421 (Fig. 4a). Further supporting a role for the OSA in the activity of at least some F-type pyocins is  
422 the fact that activity of the F7 group required the presence of OSA, while group F4 activity was  
423 blocked by OSA (Fig. 5b). While the OSA serotype clearly influences F-type pyocin host  
424 recognition, this is not the only determining factor. For example, the F7 pyocin is able to kill  
425 some but not all strains with the O6 serotype. In addition, F-type pyocins of a given type were  
426 consistently unable to kill strains encoding the same type of F-type pyocin, regardless of  
427 serotype. The mechanism of this self-immunity is not known. Many bacteriocins, such as S-type  
428 pyocins and colicins, are encoded with specific immunity proteins (11). However, there is no  
429 obvious immunity protein candidate encoded within F-type pyocin clusters as each gene is  
430 homologous to phage tail proteins. It is possible that no specific immunity proteins exist for R-  
431 type or F-type pyocins. Rather, strains may have evolved to resist their resident R- and F-type  
432 pyocins by altering their cell surface in subtle ways undetectable by the antibodies used in  
433 serotyping.

434 Overall, our study shows that F-type pyocins are produced by a large number of *P. aeruginosa*  
435 strains, they all possess antimicrobial properties, and they are promising candidates to study for  
436 the development of new therapeutics. Our identification of the specificity determinants of F-type  
437 pyocins points the way toward precisely engineering their killing as has been done with the  
438 contractile R-type pyocins and non-contractile tailocins of *Listeria* (7, 8, 10).

439



## 440 MATERIALS AND METHODS

### 441 Whole genome sequencing

442 Genomic DNA was isolated using a genomic DNA extraction kit (Bio Basic Inc). Next-  
443 generation whole genome sequencing was performed by the Donnelly Sequencing Center,  
444 University of Toronto, using Illumina HiSeq2500. *De novo* assembly of reads into contigs was  
445 performed using Velvet version 2.2.5 (38). Genes *trpE* and *trpG* were located and the region  
446 between these genes was analyzed using Geneious (39).

### 447 Bioinformatic analysis

448 Most of the bioinformatic analyses, including BLAST (40) searches and genome synteny  
449 analyses were carried out on a custom database comprised of 755 tailed phage genomes and  
450 2,119 bacterial genomes downloaded from the National Center for Biotechnology Information  
451 (NCBI) Refseq database in April 2013. This database contains diverse phage and bacterial  
452 species, but was small enough to allow manual analysis of the protein sequences and the  
453 genomic context of genes encoding proteins related to pyocin proteins. This work was aided by a  
454 synteny viewing and phage gene annotation toolkit developed in our laboratory, which will be  
455 described in detail elsewhere. Sequence alignment analysis was performed in Jalview (41). To  
456 identify protein sequences similar to less frequently occurring proteins found in the pyocin  
457 cluster (e.g. PyoR1, PyoF11, and PyoF12), alignments were constructed of the pyocin proteins.  
458 HMMER3 (32) was then used to create Hidden Markov Models (HMMs). These HMMs were  
459 used to detect proteins similar to a given pyocin protein. The genome context of genes encoding  
460 these similar proteins within phage genomes was assessed to support a conclusion that the pyocin  
461 protein possesses the same function as the phage protein. BLAST searches to identify new  
462 groups of F-type pyocins were carried out against all *P. aeruginosa* genomes available at NCBI  
463 in April, 2018.

464 HHpred searches were carried out using the online server  
465 (<https://toolkit.tuebingen.mpg.de/hhpred>) (42). HMM-based searches were carried out using  
466 HMMer (32) and analyzed by searching the Pfam (43) and TIGRFam ([www.jcvi.org/cgi-](http://www.jcvi.org/cgi-bin/tigrfams/index.cgi)  
467 [bin/tigrfams/index.cgi](http://www.jcvi.org/cgi-bin/tigrfams/index.cgi)) databases.

## 468 **Transmission electron microscopy**

469 A continuous carbon film coated EM grid was made hydrophilic by glow discharge. 5 µl of  
470 sample was applied to the surface of the grid and left for absorption for 2 minutes. Excess sample  
471 was blotted away using the corner of a filter paper. The grid was washed three times with water  
472 and stained with 2% (w/v) uranyl acetate. Grids were examined with a Hitachi H-7000  
473 microscope.

## 474 **Assays of pyocin and phage bactericidal activity**

475 To generate lysates containing pyocins and/or phages, 5 ml cultures started from overnights were  
476 grown in LB at 30 °C until the cells reached an OD<sub>600</sub> of 0.4. Mitomycin C, was then added to a  
477 final concentration of 2 µg/ml and shaking at 30 °C was resumed for 3 h or until cell lysis  
478 occurred. Chloroform was added to all induced cultures (1-2 drops/ml) to ensure maximum  
479 bacterial lysis. In experiments testing complementation from plasmids, 0.2% arabinose was  
480 added to cells after 1 h of growth at 30 °C to induce the expression of proteins from the plasmid  
481 prior to addition to mitomycin C to induce F-type pyocin induction from the genome. After lysis,  
482 cultures were incubated at room temperature with DNase (10 µg/ml) for 30 min prior to  
483 centrifugation at 10000 rpm for 10 min. For activity assays, 2 µl volumes of dilutions of these  
484 lysates were spotted onto lawns of *P. aeruginosa* strains. Lawns of strains to be tested were made  
485 by adding 150 µl of overnight culture to 3 ml of molten 0.7% top agar, which was immediately  
486 poured onto an LB agar plate and allowed to harden. To distinguish S-type pyocin activity,  
487 duplicate lawns were poured containing proteinase K (100 µg/ml). At least three biological  
488 replicates were performed for each strain and lysate combination. A lysate was scored as positive  
489 if it displayed a strong zone of cell growth inhibition in every assay. There was a range of  
490 activity in positive lysates with some displaying moderate zones of growth inhibition even when  
491 diluted 10<sup>2</sup>-fold and others displaying strong activity only when undiluted. Lysates scored as  
492 negative displayed very weak or no zones of growth inhibition in all replicate assays.

## 493 **Serotyping of *P. aeruginosa* strains**

494 Strains were serotyped using the slide agglutination method using commercial antisera (MAST  
495 Diagnostics) against all 20 *P. aeruginosa* serotypes recognized by the International Antigenic  
496 Typing Scheme (37).

497

## 498 ACKNOWLEDGEMENTS

499 This work was supported by operating grants from the Canadian Institutes of Health Research  
500 (CIHR) to A.R.D. (XNE-86943 and FDN-15427), K.L.M (MOP-136845), and A.W.E. (PHT-  
501 148819). S.S. was supported by a CIHR Doctoral Scholarship.

## 502 REFERENCES

- 503 1. Vandenneuvel D, Lavigne R, Brussow H. 2015. Bacteriophage therapy: advances in  
504 formulation strategies and human clinical trials. *Annu Rev Virol* 2:599-618.
- 505 2. Chan BK, Turner PE, Kim S, Mojibian HR, Eleftheriades JA, Narayan D. 2018. Phage  
506 treatment of an aortic graft infected with *Pseudomonas aeruginosa*. *Evol Med Public*  
507 *Health* 2018:60-66.
- 508 3. Dedrick RM, Guerrero-Bustamante CA, Garlena RA, Russell DA, Ford K, Harris K,  
509 Gilmour KC, Soothill J, Jacobs-Sera D, Schooley RT, Hatfull GF, Spencer H. 2019.  
510 Engineered bacteriophages for treatment of a patient with a disseminated drug-resistant  
511 *Mycobacterium abscessus*. *Nat Med* 25:730-733.
- 512 4. Schooley RT, Biswas B, Gill JJ, Hernandez-Morales A, Lancaster J, Lessor L, Barr JJ,  
513 Reed SL, Rohwer F, Benler S, Segall AM, Taplitz R, Smith DM, Kerr K, Kumaraswamy  
514 M, Nizet V, Lin L, McCauley MD, Strathdee SA, Benson CA, Pope RK, Leroux BM,  
515 Picel AC, Mateczun AJ, Cilwa KE, Regeimbal JM, Estrella LA, Wolfe DM, Henry MS,  
516 Quinones J, Salka S, Bishop-Lilly KA, Young R, Hamilton T. 2017. Development and  
517 use of personalized bacteriophage-based therapeutic cocktails to treat a patient with a  
518 disseminated resistant *Acinetobacter baumannii* infection. *Antimicrob Agents Chemother*  
519 61.
- 520 5. Scholl D. 2017. Phage tail-like bacteriocins. *Annu Rev Virol* 4:453-467.
- 521 6. Scholl D, Martin DW, Jr. 2008. Antibacterial efficacy of R-type pyocins towards  
522 *Pseudomonas aeruginosa* in a murine peritonitis model. *Antimicrob Agents Chemother*  
523 52:1647-52.
- 524 7. Gebhart D, Lok S, Clare S, Tomas M, Stares M, Scholl D, Donskey CJ, Lawley TD,  
525 Govoni GR. 2015. A modified R-type bacteriocin specifically targeting *Clostridium*  
526 *difficile* prevents colonization of mice without affecting gut microbiota diversity. *MBio* 6.
- 527 8. Scholl D, Cooley M, Williams SR, Gebhart D, Martin D, Bates A, Mandrell R. 2009. An  
528 engineered R-type pyocin is a highly specific and sensitive bactericidal agent for the  
529 food-borne pathogen *Escherichia coli* O157:H7. *Antimicrob Agents Chemother* 53:3074-  
530 80.
- 531 9. Ritchie JM, Greenwich JL, Davis BM, Bronson RT, Gebhart D, Williams SR, Martin D,  
532 Scholl D, Waldor MK. 2011. An *Escherichia coli* O157-specific engineered pyocin  
533 prevents and ameliorates infection by *E. coli* O157:H7 in an animal model of diarrheal  
534 disease. *Antimicrob Agents Chemother* 55:5469-74.
- 535 10. Lee G, Chakraborty U, Gebhart D, Govoni GR, Zhou ZH, Scholl D. 2016. F-Type  
536 Bacteriocins of *Listeria monocytogenes*: a new class of phage tail-like structures reveals

- 537 broad parallel coevolution between tailed bacteriophages and high-molecular-weight  
538 bacteriocins. *J Bacteriol* 198:2784-93.
- 539 11. Michel-Briand Y, Baysse C. 2002. The pyocins of *Pseudomonas aeruginosa*. *Biochimie*  
540 84:499-510.
- 541 12. Nakayama K, Takashima K, Ishihara H, Shinomiya T, Kageyama M, Kanaya S, Ohnishi  
542 M, Murata T, Mori H, Hayashi T. 2000. The R-type pyocin of *Pseudomonas aeruginosa*  
543 is related to P2 phage, and the F-type is related to lambda phage. *Mol Microbiol* 38:213-  
544 31.
- 545 13. Uratani Y, Hoshino T. 1984. Pyocin R1 inhibits active transport in *Pseudomonas*  
546 *aeruginosa* and depolarizes membrane potential. *J Bacteriol* 157:632-6.
- 547 14. Scholl D, Gebhart D, Williams SR, Bates A, Mandrell R. 2012. Genome sequence of *E.*  
548 *coli* O104:H4 leads to rapid development of a targeted antimicrobial agent against this  
549 emerging pathogen. *PLoS One* 7:e33637.
- 550 15. Williams SR, Gebhart D, Martin DW, Scholl D. 2008. Retargeting R-type pyocins to  
551 generate novel bactericidal protein complexes. *Appl Environ Microbiol* 74:3868-76.
- 552 16. Ghequire MG, De Mot R. 2014. Ribosomally encoded antibacterial proteins and peptides  
553 from *Pseudomonas*. *FEMS Microbiol Rev* 38:523-68.
- 554 17. Kuroda K, Kageyama M. 1981. Comparative study of F-type pyocins of *Pseudomonas*  
555 *aeruginosa*. *J Biochem* 89:1721-36.
- 556 18. Govan JR. 1974. Studies on the pyocins of *Pseudomonas aeruginosa*: production of  
557 contractile and flexuous pyocins in *Pseudomonas aeruginosa*. *J Gen Microbiol* 80:17-30.
- 558 19. Kuroda K, Kageyama M. 1979. Biochemical properties of a new flexuous bacteriocin,  
559 pyocin F1, produced by *Pseudomonas aeruginosa*. *J Biochem* 85:7-19.
- 560 20. Takeya K, Minamishima Y, Amako K, Ohnishi Y. 1967. A small rod-shaped pyocin.  
561 *Virology* 31:166-8.
- 562 21. Bondy-Denomy J, Qian J, Westra ER, Buckling A, Guttman DS, Davidson AR, Maxwell  
563 KL. 2016. Prophages mediate defense against phage infection through diverse  
564 mechanisms. *ISME J* doi:10.1038/ismej.2016.79.
- 565 22. Matsui H, Sano Y, Ishihara H, Shinomiya T. 1993. Regulation of pyocin genes in  
566 *Pseudomonas aeruginosa* by positive (prtN) and negative (prtR) regulatory genes. *J*  
567 *Bacteriol* 175:1257-63.
- 568 23. Winsor GL, Lam DK, Fleming L, Lo R, Whiteside MD, Yu NY, Hancock RE, Brinkman  
569 FS. 2011. *Pseudomonas* Genome Database: improved comparative analysis and  
570 population genomics capability for *Pseudomonas* genomes. *Nucleic Acids Res* 39:D596-  
571 600.
- 572 24. Deighan P, Hochschild A. 2007. The bacteriophage lambdaQ anti-terminator protein  
573 regulates late gene expression as a stable component of the transcription elongation  
574 complex. *Mol Microbiol* 63:911-20.
- 575 25. Young R. 2014. Phage lysis: three steps, three choices, one outcome. *J Microbiol* 52:243-  
576 58.
- 577 26. Kohler T, Donner V, van Delden C. 2010. Lipopolysaccharide as shield and receptor for  
578 R-pyocin-mediated killing in *Pseudomonas aeruginosa*. *J Bacteriol* 192:1921-8.
- 579 27. Davidson AR, Cardarelli L, Pell LG, Radford DR, Maxwell KL. 2012. Long  
580 noncontractile tail machines of bacteriophages. *Adv Exp Med Biol* 726:115-42.
- 581 28. Pell LG, Liu A, Edmonds L, Donaldson LW, Howell PL, Davidson AR. 2009. The X-ray  
582 crystal structure of the phage lambda tail terminator protein reveals the biologically

- 583 relevant hexameric ring structure and demonstrates a conserved mechanism of tail  
584 termination among diverse long-tailed phages. *J Mol Biol* 389:938-51.
- 585 29. Auzat I, Petitpas I, Lurz R, Weise F, Tavares P. 2014. A touch of glue to complete  
586 bacteriophage assembly: the tail-to-head joining protein (THJP) family. *Mol Microbiol*  
587 91:1164-78.
- 588 30. Wang J, Hofnung M, Charbit A. 2000. The C-terminal portion of the tail fiber protein of  
589 bacteriophage lambda is responsible for binding to LamB, its receptor at the surface of  
590 *Escherichia coli* K-12. *J Bacteriol* 182:508-12.
- 591 31. Werts C, Michel V, Hofnung M, Charbit A. 1994. Adsorption of bacteriophage lambda  
592 on the LamB protein of *Escherichia coli* K-12: point mutations in gene J of lambda  
593 responsible for extended host range. *J Bacteriol* 176:941-7.
- 594 32. Finn RD, Clements J, Arndt W, Miller BL, Wheeler TJ, Schreiber F, Bateman A, Eddy  
595 SR. 2015. HMMER web server: 2015 update. *Nucleic Acids Res* 43:W30-8.
- 596 33. Hendrix RW, Duda RL. 1992. Bacteriophage lambda PaPa: not the mother of all lambda  
597 phages. *Science* 258:1145-8.
- 598 34. North OI, Sakai K, Yamashita E, Nakagawa A, Iwazaki T, Buttner CR, Takeda S,  
599 Davidson AR. 2019. Phage tail fibre assembly proteins employ a modular structure to  
600 drive the correct folding of diverse fibres. *Nat Microbiol* 4:1645-1653.
- 601 35. Gillies RR, Govan JR. 1966. Typing of *Pseudomonas pyocyanea* by pyocine production.  
602 *J Pathol Bacteriol* 91:339-45.
- 603 36. Liberati NT, Urbach JM, Miyata S, Lee DG, Drenkard E, Wu G, Villanueva J, Wei T,  
604 Ausubel FM. 2006. An ordered, nonredundant library of *Pseudomonas aeruginosa* strain  
605 PA14 transposon insertion mutants. *Proc Natl Acad Sci U S A* 103:2833-8.
- 606 37. Lam JS, Taylor VL, Islam ST, Hao Y, Kocincova D. 2011. Genetic and Functional  
607 Diversity of *Pseudomonas aeruginosa* Lipopolysaccharide. *Front Microbiol* 2:118.
- 608 38. Zerbino DR, Birney E. 2008. Velvet: algorithms for de novo short read assembly using  
609 de Bruijn graphs. *Genome Res* 18:821-9.
- 610 39. Kearse M, Moir R, Wilson A, Stones-Havas S, Cheung M, Sturrock S, Buxton S, Cooper  
611 A, Markowitz S, Duran C, Thierer T, Ashton B, Meintjes P, Drummond A. 2012.  
612 Geneious Basic: an integrated and extendable desktop software platform for the  
613 organization and analysis of sequence data. *Bioinformatics* 28:1647-9.
- 614 40. Altschul SF, Koonin EV. 1998. Iterated profile searches with PSI-BLAST--a tool for  
615 discovery in protein databases. *Trends Biochem Sci* 23:444-7.
- 616 41. Waterhouse AM, Procter JB, Martin DM, Clamp M, Barton GJ. 2009. Jalview Version 2-  
617 -a multiple sequence alignment editor and analysis workbench. *Bioinformatics* 25:1189-  
618 91.
- 619 42. Zimmermann L, Stephens A, Nam SZ, Rau D, Kubler J, Lozajic M, Gabler F, Soding J,  
620 Lupas AN, Alva V. 2018. A completely reimplemented MPI bioinformatics toolkit with a  
621 new HHpred server at its core. *J Mol Biol* 430:2237-2243.
- 622 43. Finn RD, Mistry J, Tate J, Coggill P, Heger A, Pollington JE, Gavin OL, Gunasekaran P,  
623 Ceric G, Forslund K, Holm L, Sonnhammer EL, Eddy SR, Bateman A. 2010. The Pfam  
624 protein families database. *Nucleic Acids Res* 38:D211-22.
- 625 44. Buttner CR, Wu Y, Maxwell KL, Davidson AR. 2016. Baseplate assembly of phage Mu:  
626 Defining the conserved core components of contractile-tailed phages and related bacterial  
627 systems. *Proc Natl Acad Sci U S A* 113:10174-9.

- 628 45. Xu J, Hendrix RW, Duda RL. 2014. Chaperone-protein interactions that mediate  
629 assembly of the bacteriophage lambda tail to the correct length. *J Mol Biol* 426:1004-18.  
630  
631

632 **TABLES**

633 **Table 1. Gene composition of the pyocin operon in *P. aeruginosa* strain PA14**

| <b>Gene name<br/>(this study)</b> | <b>PA14 locus-tag</b> | <b>Identity with<br/>HK022<br/>Homolog (%)<sup>1</sup></b> | <b>Protein Function</b>                       |
|-----------------------------------|-----------------------|------------------------------------------------------------|-----------------------------------------------|
| pyoRF1                            | PA14_07950            |                                                            | Activator (PrtN)                              |
| pyoRF2                            | PA14_07960            |                                                            | Repressor (PrtR)                              |
| pyoRF3                            | PA14_07970            |                                                            | Zinc finger transcription factor <sup>2</sup> |
| pyoRF4                            | PA14_07980            |                                                            | Lambda gpQ-like <sup>2</sup>                  |
| pyoRF5                            | PA14_07990            |                                                            | Holin <sup>2</sup>                            |
| pyoR1                             | PA14_08000            |                                                            | Tail Terminator <sup>2</sup>                  |
| pyoR2                             | PA14_08010            |                                                            | Tail Spike                                    |
| pyoR3                             | PA14_08020            |                                                            | Baseplate Wedge 1 <sup>3</sup>                |
| pyoR4                             | PA14_08030            |                                                            | Baseplate Wedge 2 <sup>3</sup>                |
| pyoR5                             | PA14_08040            |                                                            | Baseplate Wedge 3 <sup>3</sup>                |
| pyoR6                             | PA14_08050            |                                                            | Tail Fiber                                    |
| pyoR7                             | PA14_08060            |                                                            | Tail Fiber Chaperone                          |
| pyoR8                             | PA14_08070            |                                                            | Tail Sheath                                   |
| pyoR9                             | PA14_08090            |                                                            | Tail Tube                                     |
| pyoR10                            | PA14_08100            |                                                            | Tape Measure Chaperone                        |
| pyoR11                            | PA14_08110            |                                                            | Tape Measure Chaperone <sup>4</sup>           |
| pyoR12                            | PA14_08120            |                                                            | Tape Measure                                  |
| pyoR13                            | PA14_08130            |                                                            | Baseplate hub 1 <sup>3</sup>                  |
| pyoR14                            | PA14_08140            |                                                            | Baseplate LysM domain                         |
| pyoR15                            | PA14_08150            |                                                            | Baseplate hub 2 <sup>3</sup>                  |
| pyoRF6                            | PA14_08160            |                                                            | Peptidoglycan hydrolase                       |
| pyoRF7                            | PA14_08180            |                                                            | Spannin (Rz) <sup>2</sup>                     |
| pyoRF8                            | PA14_08190            |                                                            | Spannin (Rz1) <sup>2</sup>                    |
| pyoF1                             | PA14_08200            |                                                            | Unknown                                       |
| pyoF2                             | PA14_08210            | 54                                                         | Tail Tube                                     |
| pyoF3                             | PA14_08220            | ND                                                         | Tape Measure Chaperone                        |
| pyoF4                             | PA14_08230            | 36                                                         | Tape Measure Chaperone <sup>4</sup>           |
| pyoF5                             | PA14_08240            | 35                                                         | Tape Measure                                  |
| pyoF6                             | PA14_08250            | 37                                                         | Tail tip protein                              |
| pyoF7                             | PA14_08260            | 46                                                         | Tail tip protein                              |
| pyoF8                             | PA14_08270            | 44                                                         | Tail tip protein                              |
| pyoF9                             | PA14_08280            | 49                                                         | Tail tip protein                              |
| pyoF10                            | PA14_08300            | 44                                                         | Central fiber                                 |

|                     |            |    |                                  |
|---------------------|------------|----|----------------------------------|
| pyoF11 <sup>5</sup> | NA         | 24 | Module 1 specificity determinant |
| pyoF12 <sup>5</sup> | NA         | ND | Module 1 specificity determinant |
| pyoF13              | PA14_08310 | 20 | Module 2 specificity determinant |
| pyoF14              | PA14_08320 |    | Module 2 specificity determinant |
| pyoF15              | PA14_08330 |    | Module 2 specificity determinant |

---

634

635 <sup>1</sup>Values are pairwise percent amino acid identity, and are shown for tail morphogenesis proteins that are  
636 present in both *E. coli* phage HK022 and the F-type pyocin cluster. The genes encoding these proteins are  
637 arranged syntenically in the two clusters. “ND” denotes that likely homologous proteins were present, but  
638 the pairwise sequence identity was below 20%.

639 <sup>2</sup>Functions were predicted using HHpred.

640 <sup>3</sup>These myophage baseplate functions are defined in Buttner *et al.* (44).

641 <sup>4</sup>The second Tape Measure Chaperone encoding segment is appended to the first through a programmed  
642 translational frameshift (45). The annotation of this ORF is missed in many *P. aeruginosa* genomes.

643 <sup>5</sup>These proteins, though clearly encoded in the PA14 genome, were not annotated.

644



645

646 **Table 2. Plasmid-based complementation of *pyoF11* to *pyoF15* mutants**

| <b>Mutated Gene</b> | <b>Gene(s) expressed on complementing plasmid</b> | <b>Complementation Result</b> |
|---------------------|---------------------------------------------------|-------------------------------|
| <i>pyoF11</i>       | <i>pyoF11</i>                                     | No                            |
| <i>pyoF11</i>       | <i>pyoF11+pyoF12</i>                              | Yes                           |
| <i>pyoF11</i>       | $\Delta pyoF11^1+pyoF12$                          | No                            |
| <i>pyoF11</i>       | <i>pyoF12</i>                                     | No                            |
| <i>pyoF12</i>       | <i>pyoF12</i>                                     | Yes                           |
| <i>pyoF13</i>       | <i>pyoF13</i>                                     | No                            |
| <i>pyoF13</i>       | <i>pyoF13+pyoF14+pyoF15</i>                       | Yes                           |
| <i>pyoF13</i>       | <i>pyoF14+ pyoF15</i>                             | No                            |
| <i>pyoF14</i>       | <i>pyoF14</i>                                     | No                            |
| <i>pyoF14</i>       | <i>pyoF14+pyoF15</i>                              | Yes                           |
| <i>pyoF14</i>       | $\Delta pyoF14^1+pyoF15$                          | No                            |
| <i>pyoF15</i>       | <i>pyoF15</i>                                     | Yes                           |
| <i>pyoF15</i>       | $\Delta pyoF14^1+pyoF15$                          | Yes                           |

647 <sup>1</sup>These plasmids express two genes but the first bears an in-frame deletion.

## 648 **FIGURE LEGENDS**

649 **FIG 1** Transmission electron micrographs of lysates of cells producing R- and F-type pyocins.  
650 Shown are a lysate of strain S22 (left panel), which produces both R- and F-type pyocins; a  
651 lysate of strain S13 (middle panel), which produces just R-pyocins; and a lysate of strain S18  
652 (right panel), which produces just F-pyocins. R-type pyocin particles are indicated by green  
653 arrows and F-type pyocin particles are indicated by red arrows. Grids were negatively stained  
654 with uranyl acetate. The scale bar shown applies to all three micrographs.

655  
656 **FIG 2** R- and F-type pyocin operons. (a) Three types of R- or F-pyocin operons are found in *P.*  
657 *aeruginosa*: operons encode just R-pyocins (top), R- and F-pyocins (middle, or just F-pyocins  
658 (bottom). All three types share the same regulatory genes (orange) and lysis genes (brown).  
659 Genes unique to R-pyocins are colored green and those unique to F-pyocins are colored red. All  
660 three types of operons are located in the same position in the *P. aeruginosa* genome between the  
661 *trpE* and *trpG* genes. (b) A close up of genes encoded at the 3'-end of the F-type pyocin clusters  
662 show the six different groups identified in our sequenced strains. The numbers above the genes  
663 indicate the percent pairwise sequence identity of the encoded protein with the homolog found in  
664 strain PA14 (group 5). Proteins PyoF13, PyoF14 and PyoF15, which are duplicated in group F2,  
665 are very closely related (>95% sequence identity) in groups F5, F4 and F2 (second group) as  
666 indicated by their coloring. The same proteins are highly similar in groups F1 and F6. In the  
667 cases of PyoF10 and PyoF13, sequence comparison were performed including only their variable  
668 C-terminal domains. *P. aeruginosa* strains where certain groups were previously identified are  
669 shown in parentheses.

670 **FIG 3** Bactericidal activity of F-type pyocins. (a) Bactericidal activity caused by F- or R-type  
671 pyocins can be distinguished from that caused by phages of S-pyocins. S-pyocin activity is  
672 destroyed by addition of proteinase K. Zones of clearing resulting from phages resolve into  
673 individual plaques upon dilution. (b) The bactericidal activity of F-type pyocins on a selected  
674 group of bacterial lawns is shown. These lawns were selected to emphasize the differences in  
675 specificity among the different groups. Black boxes denote strains killed by a given F-type  
676 pyocin while white boxes denote no killing. The gray box indicates a case where the killing by  
677 pyocins was occluded by phage plaquing. Bactericidal activity of the F5 group was determined  
678 using a mutant strain of PA14 bearing a transposon insertion in the *pyoR3* gene, so that the lysate

679 contained only F-type pyocin particles (indicated by an asterisk). The F1- and F6-type pyocins  
680 were produced in strains that also produced R1-pyocins. By comparing with a strain producing  
681 only R1-type pyocins, two strains killed only by these F-type pyocins could be identified  
682 (marked with “F”). (c) R- or F-pyocin lysates made from strain PA14 were spotted on a lawn of  
683 strain S19. Lysates were produced from wild-type PA14 and strains bearing transposon insertions  
684 in either the *pyoR6* or *pyoF10* genes. (d) F7-type pyocins produced from strain S24 or Strain S8  
685 were spotted on lawns of strain S14 or strain PAO1.

686

687 **FIG 4** (a) The effect of LPS serotype on bactericidal activity of F-type pyocins. The bactericidal  
688 activity of F-type pyocins on a group of bacterial lawns arranged by their serotypes is shown.  
689 Black boxes denote strains killed by a given F-type pyocin while white boxes denote no killing.  
690 The gray box indicates a case where the killing by pyocins was occluded by phage plaquing.  
691 Bactericidal activity of the F5 group was determined using a mutant strain of PA14 bearing a  
692 transposon insertion in the *pyoR3* gene, so that the lysate contained only F-type pyocin particles  
693 (indicated by an asterisk). The F1- and F6-type pyocins were produced in strains that also  
694 produced R1-pyocins. By comparing with a strain producing only R1-type pyocins, two strains  
695 killed only by these F-type pyocins could be identified (marked with “F”). (b) The indicated F-  
696 type pyocin containing lysates were tested against mutants that lack OSA ( $\Delta wbpM$ ).

697

698 **FIG 5** All F-type pyocin groups. A close up of genes encoded at the 3'-end of F-type pyocin  
699 clusters shows the 11 different groups identified in our sequenced strains and in the database.  
700 Groups of genes are colored the same if the proteins they encode display greater than 90%  
701 sequence identity. The extent of Specificity Modules 1 and 2 are shown at the top as are the  
702 names of the genes in these regions. *P. aeruginosa* strains where certain groups were previously  
703 identified are shown in parentheses.

704

## 705 SUPPLEMENTAL MATERIAL

### 706 Supplemental Materials and Methods

707 In separate file.

### 708 Supplementary Table 1

709 List of strains used and origin (in separate file)

### 710 Supplementary Table 2

711 List of primers used (in separate file)

712

### 713 Supplementary Figure Legends

714 **FIG S1** Pairwise identities among F-type pyocin proteins encoded at the 3'-end of the operon.

715 All against all pairwise percent identities for the indicated proteins are shown. The F-pyocin  
716 groups of the proteins that are being compared are indicated at the sides and top of each table.

717 Numbers that are shaded denote groups that share Specificity Modules. The PyoF10 comparisons  
718 include only the C-terminal 60 amino acids. PyoF13 comparisons include only the last 210  
719 residues of these proteins. The F7 group does not encode PyoF14, so these boxes are left blank.

720 “<20” denotes sequences that could not be well aligned in a pairwise alignment. F21 and F22  
721 refer to the duplicated PyoF13, PyoF14, and PyoF15 proteins encoded in the F2 group.

722

723 **FIG S2** Protein sequence alignments of PyoF11 and PyoF12 from each F-type pyocin group. (a)

724 An alignment of PyoF11 homologs is shown from the 11 F-type pyocin groups and selected  
725 phages. (b) An alignment of PyoF11 homologs is shown from the 11 F-type pyocin groups and  
726 selected phages. The phage proteins are from *Burkholderia* phages KS9 (NC\_013055) and  
727 BcepGomr (NC\_009447); *P. aeruginosa* phages LIT1 (NC\_013692) and LUZ7 (NC\_013691);  
728 and *E. coli* phages T1 (NC\_005833) and N15 (NC\_001901).

729

730 **FIG S3** Protein sequence alignments of PyoF13 from each F-type pyocin group. (a) An

731 alignment of the N-terminal 140 amino acids of PyoF13 homologs from the 11 F-type pyocin

732 groups is shown. (b) An alignment of the C-terminal 210 amino acids of PyoF13 homologs from  
733 the 11 F-type pyocin groups is shown.

734

735 **FIG S4** Protein sequence alignments of the tail fiber proteins (PyoR6) from each R-type pyocin  
736 group. (a) An alignment of the N-terminal 450 amino acids of the PyoR6 homologs is shown. (b)  
737 An alignment of the C-terminal 250 amino acids PyoR6 homologs is shown. (c) The pairwise  
738 sequence identities of the PyoR6 N-terminal and C-terminal regions are shown. The locus tags  
739 for the proteins shown are R1 (PLES\_06171), R2 (PA14\_08050), and R5 (PA0620).

740

741 **FIG S5** The bactericidal activity of all F-type pyocin lysates tested on all of the *P. aeruginosa*  
742 strains used in this study.

Strain S22: R- and F-pyocins

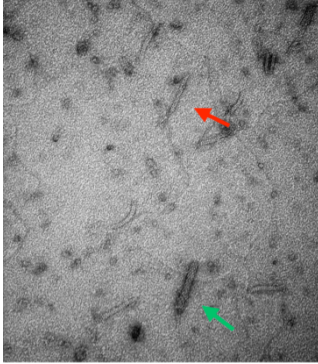

Strain S13: R-pyocins

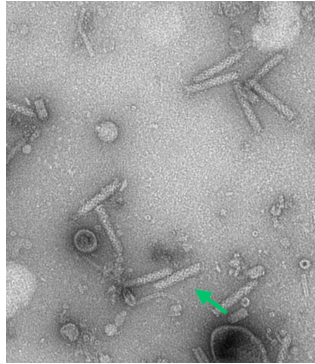

Strain S18: F-pyocins

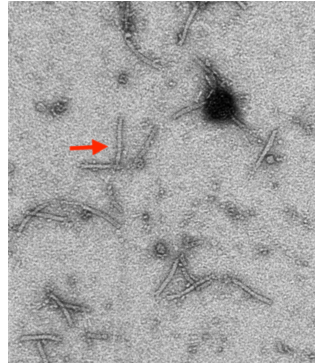

— 100 nm

**FIG 1** Transmission electron micrographs of lysates of cells producing R- and F-type pyocins. Shown are a lysate of strain S22 (left panel), which produces both R- and F-type pyocins; a lysate of strain S13 (middle panel), which produces just R-pyocins; and a lysate of strain S18 (right panel), which produces just F-pyocins. R-type pyocin particles are indicated by green arrows and F-type pyocin particles are indicated by red arrows. Grids were negatively stained with uranyl acetate. The scale bar shown applies to all three micrographs.

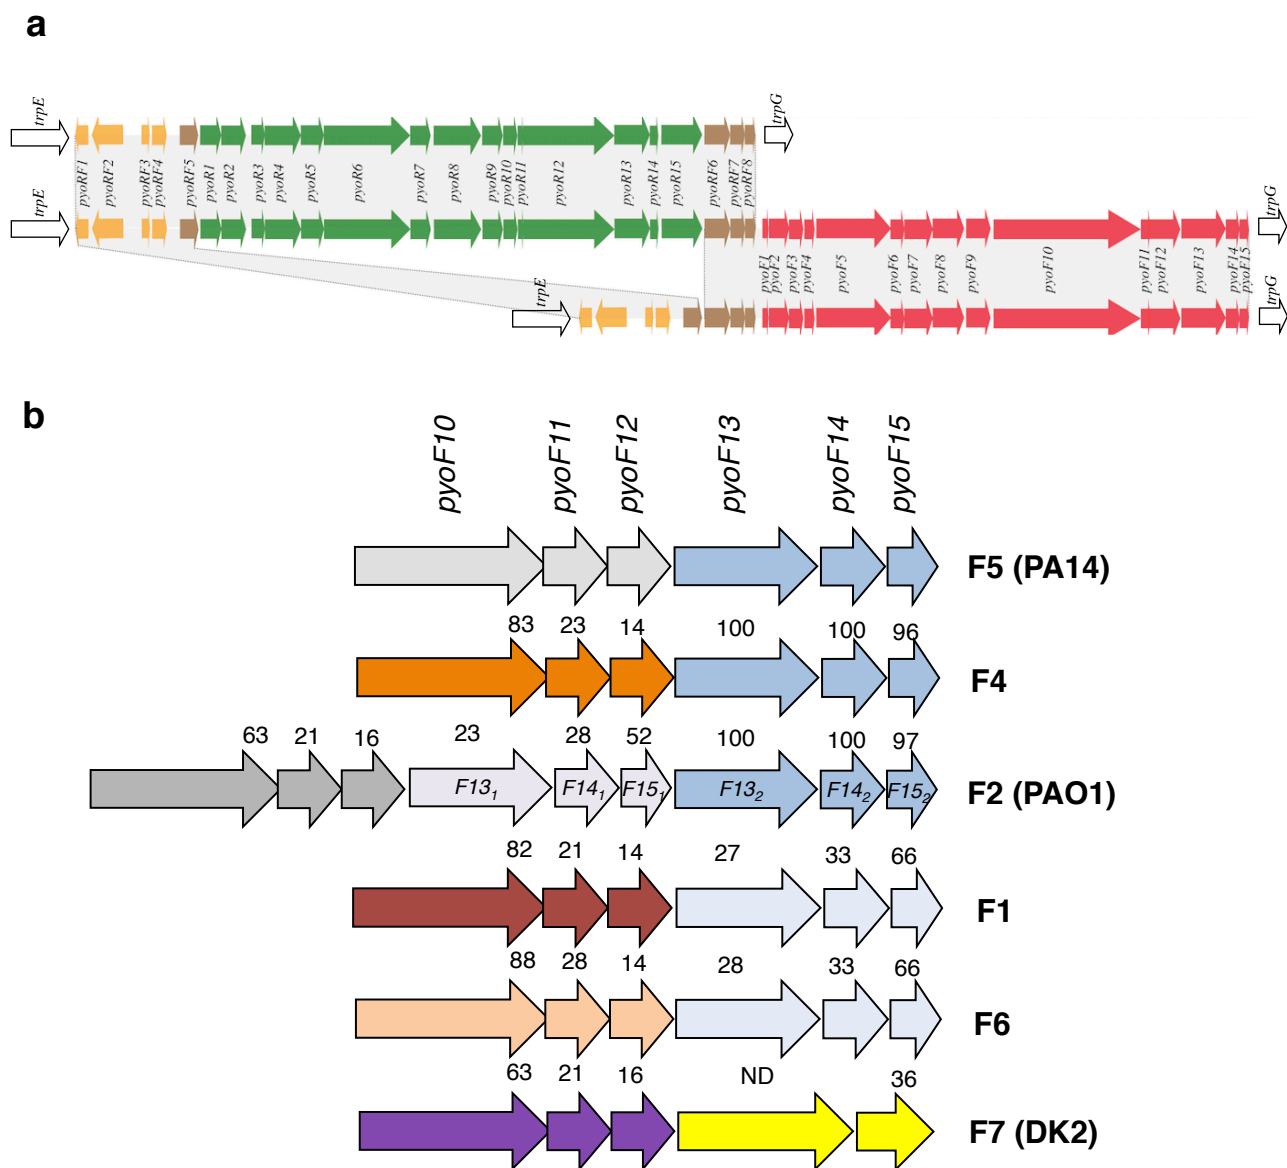

**FIG 2** R- and F-type pyocin operons. (a) Three types of R- or F-pyocin operons are found in *P. aeruginosa*: operons encode just R-pyocins (top), R- and F-pyocins (middle, or just F-pyocins (bottom). All three types share the same regulatory genes (orange) and lysis genes (brown). Genes unique to R-pyocins are colored green and those unique to F-pyocins are colored red. All three types of operons are located in the same position in the *P. aeruginosa* genome between the *trpE* and *trpG* genes. (b) A close up of genes encoded at the 3'-end of the F-type pyocin clusters show the six different groups identified in our sequenced strains. The numbers above the genes indicate the percent pairwise sequence identity of the encoded protein with the homolog found in strain PA14 (group 5). Proteins PyoF13, PyoF14 and PyoF15, which are duplicated in group F2, are very closely related (>95% sequence identity) in groups F5, F4 and F2 (second group) as indicated by their coloring. The same proteins are highly similar in groups F1 and F6. In the cases of PyoF10 and PyoF13, sequence comparison were carried only including their variable C-terminal domains. *P. aeruginosa* strains where certain groups were previously identified are shown in parentheses.

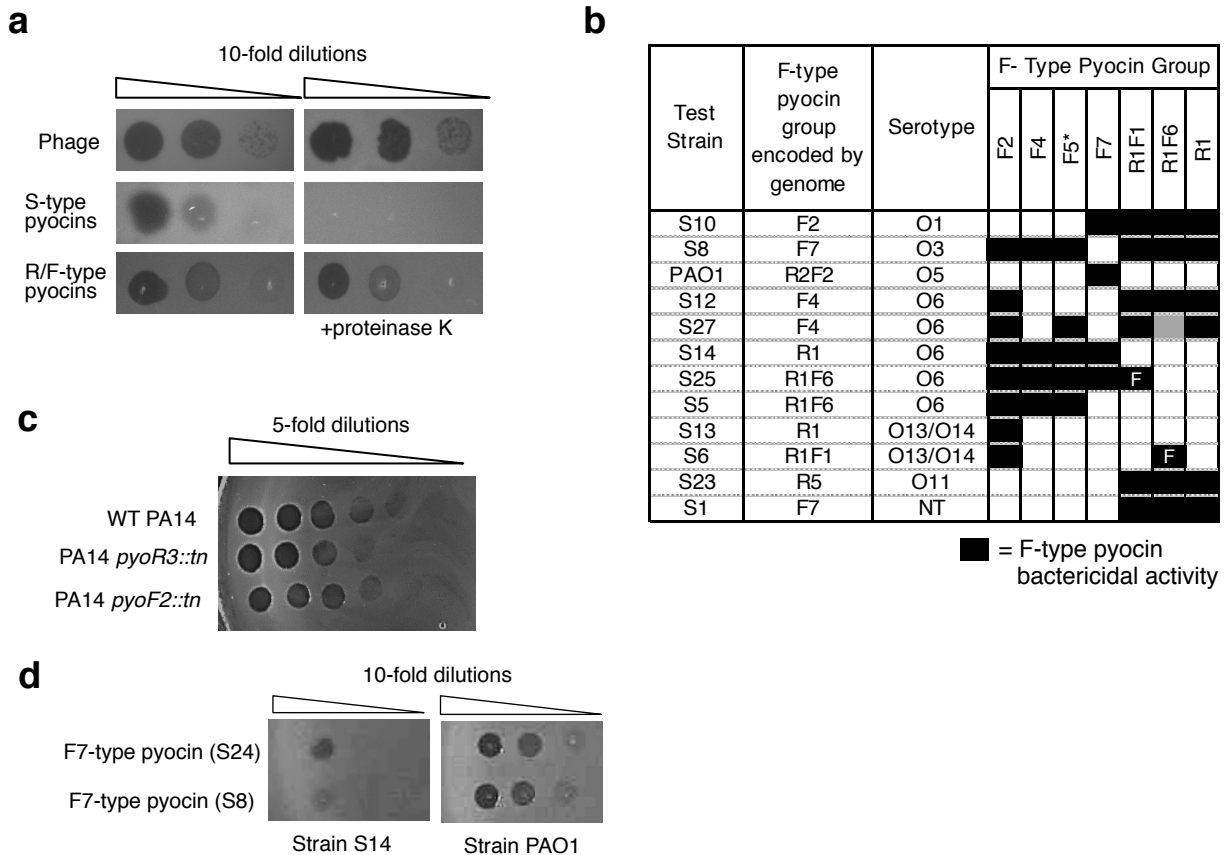

**FIG 3** Bactericidal activity of F-type pyocins. (a) Bactericidal activity caused by F- or R-type pyocins can be distinguished from that caused by phages of S-pyocins. S-pyocin activity is destroyed by addition of proteinase K. Zones of clearing resulting from phages resolve into individual plaques upon dilution. (b) The bactericidal activity of F-type pyocins on a selected group of bacterial lawns is shown. These lawns were selected to emphasize the differences in specificity among the different groups. Black boxes denote strains killed by a given F-type pyocin while white boxes denote no killing. The gray box indicates a case where the killing by pyocins was occluded by phage plaquing. Bactericidal activity of the F5 group was determined using a mutant strain of PA14 bearing a transposon insertion in the *pyoR3* gene, so that the lysate contained only F-type pyocin particles (indicated by an asterisk). The F1- and F6-type pyocins were produced in strains that also produced R1-pyocins. By comparing with a strain producing only R1-type pyocins, two strains killed only by these F-type pyocins could be identified (marked with “F”). (c) R- or F-pyocin lysates made from strain PA14 were spotted on a lawn of strain S19. Lysates were produced from wild-type PA14 and strains bearing transposon insertions in either the *pyoR6* or *pyoF10* genes. (d) F7-type pyocins produced from strain S24 or Strain S8 were spotted on lawns of strain S14 or strain PAO1.



**a**

| Test Strain | F-type pyocin group encoded by genome | Serotype | pyocin group |    |     |    |      |      |    |
|-------------|---------------------------------------|----------|--------------|----|-----|----|------|------|----|
|             |                                       |          | F2           | F4 | F5* | F7 | R1F1 | R1F6 | R1 |
| S10         | F2                                    | O1       |              |    |     |    |      |      |    |
| S28         | F2                                    | O1       |              |    |     |    |      |      |    |
| S3          | R2 F2                                 | O2       |              |    |     |    |      |      |    |
| S4          | R2 F2                                 | O2       |              |    |     |    |      |      |    |
| S7          | R2 F2                                 | O2       |              |    |     |    |      |      |    |
| S8          | F8                                    | O3       |              |    |     |    |      |      |    |
| S24         | F8                                    | O3       |              |    |     |    |      |      |    |
| S15         | R5                                    | O4       |              |    |     |    |      |      |    |
| PAO1        | R2 F2                                 | O5       |              |    |     |    |      |      |    |
| S9          | R2 F2                                 | O5       |              |    |     |    |      |      |    |
| S17         | R2 F2                                 | O5       |              |    |     |    |      |      |    |
| S11         | R2 F2                                 | O5       |              |    |     |    |      |      |    |
| S12         | F4                                    | O6       |              |    |     |    |      |      |    |
| S27         | F4                                    | O6       |              |    |     |    |      |      |    |
| S14         | R1                                    | O6       |              |    |     |    |      |      |    |
| S22         | R1                                    | O6       |              |    |     |    |      |      |    |
| S19         | R1                                    | O6       |              |    |     |    |      |      |    |
| S20         | R1                                    | O6       |              |    |     |    |      |      |    |
| S25         | R1 F6                                 | O6       |              |    |     |    |      |      |    |
| S5          | R1 F6                                 | O6       |              |    |     |    |      |      |    |
| PA14        | R2 F5                                 | O10      |              |    |     |    |      |      |    |
| S16         | R2 F5                                 | O10      |              |    |     |    |      |      |    |
| S13         | R1                                    | O13/O14  |              |    |     |    |      |      |    |
| S21         | R1                                    | O13/O14  |              |    |     |    |      |      |    |
| S6          | R1 F1                                 | O13/O14  |              |    |     |    |      |      |    |
| S18         | R2 F2                                 | O16      |              |    |     |    |      |      |    |
| S2          | R1                                    | HOMMA15  |              |    |     |    |      |      |    |
| S23         | R5                                    | O11      |              |    |     |    |      |      |    |
| S1          | F7                                    | NT       |              |    |     |    |      |      |    |
| S26         | F7                                    | NT       |              |    |     |    |      |      |    |

■ = F-type pyocin bactericidal activity

**b**

| Test Strain        | F-type pyocin group encoded by genome | Serotype | pyocin group |    |     |    |      |      |    |
|--------------------|---------------------------------------|----------|--------------|----|-----|----|------|------|----|
|                    |                                       |          | F2           | F4 | F5* | F7 | R1F1 | R1F6 | R1 |
| PAO1               | R2 F2                                 | O5       |              |    |     |    |      |      |    |
| PAO1 $\Delta$ wbpM | R2 F2                                 | no OSA   |              |    |     |    |      |      |    |
| PA14               | R2 F5                                 | O10      |              |    |     |    |      |      |    |
| PA14 $\Delta$ wbpM | R2 F5                                 | no OSA   |              |    |     |    |      |      |    |

**FIG 4** (a) The effect of LPS serotype on bactericidal activity of F-type pyocins. The bactericidal activity of F-type pyocins on a group of bacterial lawns arranged by their serotypes is shown. Black boxes denote strains killed by a given F-type pyocin while white boxes denote no killing. The gray box indicates a case where the killing by pyocins was occluded by phage plaquing. Bactericidal activity of the F5 group was determined using a mutant strain of PA14 bearing a transposon insertion in the *pyoR3* gene, so that the lysate contained only F-type pyocin particles (indicated by an asterisk). The F1- and F6-type pyocins were produced in strains that also produced R1-pyocins. By comparing with a strain producing only R1-type pyocins, two strains killed only by these F-type pyocins could be identified (marked with “F”). (b) The indicated F-type pyocin containing lysates were tested against mutants that lack OSA ( $\Delta$ wbpM).

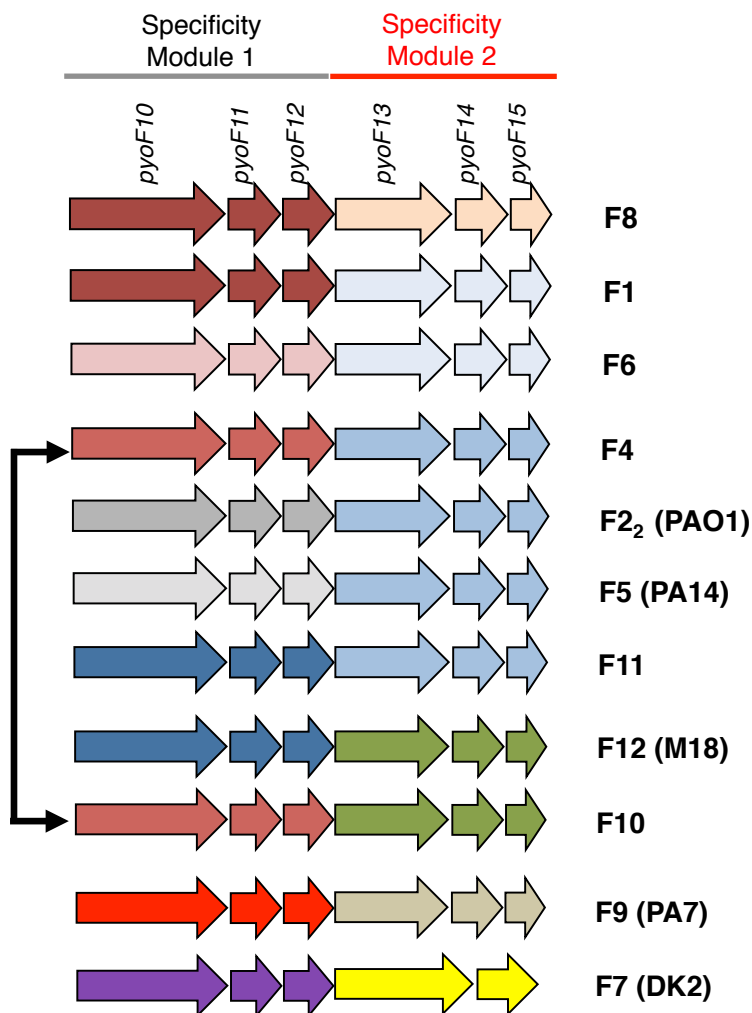

**FIG 5** All F-type pyocin groups. A close up of genes encoded at the 3'-end of F-type pyocin clusters shows the 11 different groups identified in our sequenced strains and in the database. Groups of genes are colored the same if the proteins they encode display greater than 90% sequence identity. The extent of Specificity Modules 1 and 2 are shown at the top as are the names of the genes in these regions. *P. aeruginosa* strains where certain groups were previously identified are shown in parentheses.
